# Supplementary material for: Groundwater Hydrograph Decomposition With the HydroSight Model
Source: Frontiers journal article supplement (doi:10.3389/fenvs.2021.736400), 2021-07-30
Supplement: Data_Sheet_1.docx [file Data_Sheet_1.docx]

Supplementary Material

## Supplementary Figures


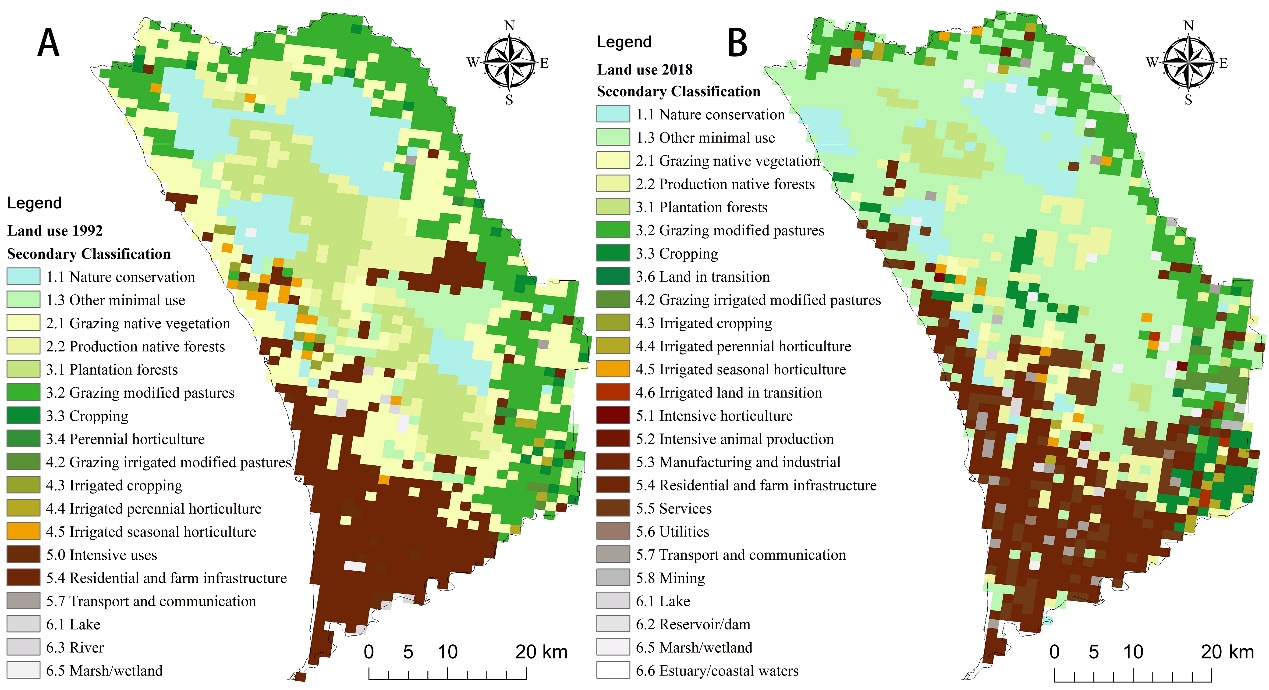


**Supplementary Figure 1.** Land use map of the Gnangara region in 1992 (A) and 2018 (B).


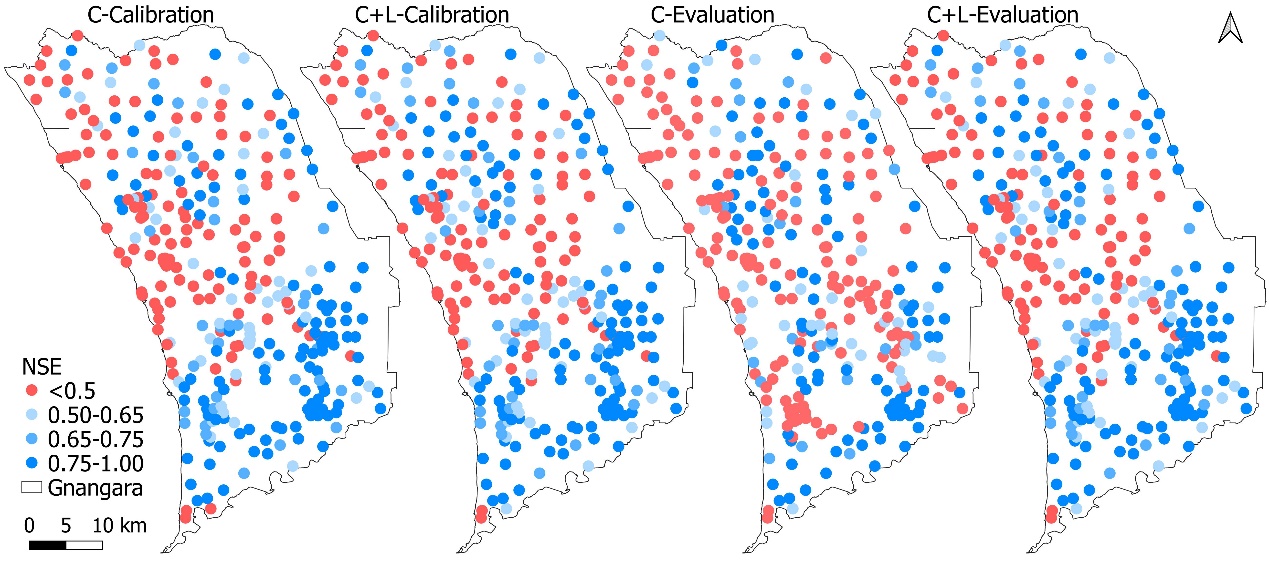


**Supplementary Figure 2.** Distribution of the model performance results of the climate-only (C) analysis, and climate and land cover (C+L) analysis during the calibration and evaluation period.


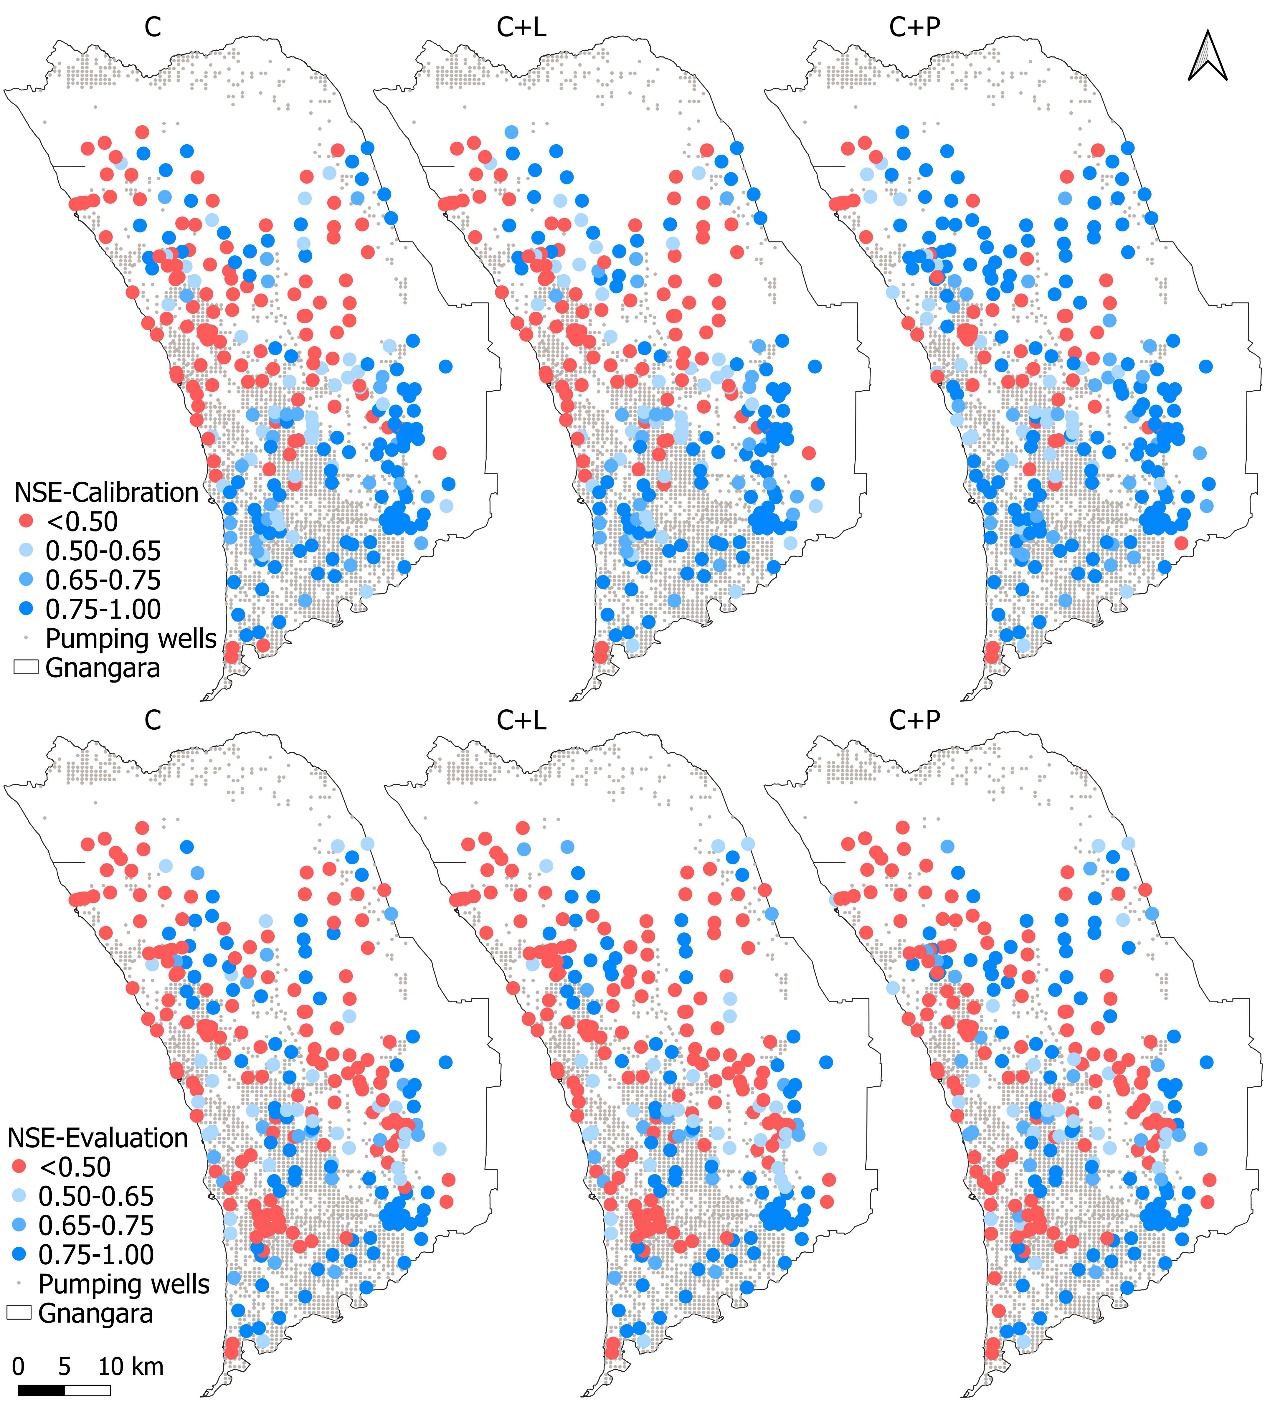


**Supplementary Figure 3.** NSE spatial distribution of the climate-only (C), climate and land cover (C+L), and climate and pumping (C+P) analyses.
